# Supplementary material for: Mosaic deletion patterns of the human antibody heavy chain gene locus shown by Bayesian haplotyping
Source: PubMed Central journal article supplement (PMC6367474; doi:10.1038/s41467-019-08489-3), 2019-02-07
Supplement: 41467_2019_8489_MOESM1_ESM.pdf [file 41467_2019_8489_MOESM1_ESM.pdf]

# Mosaic deletion patterns of the human antibody heavy chain gene locus shown by Bayesian haplotyping

Moriah Gidoni<sup>1</sup>, Omri Snir<sup>2</sup>, Ayelet Peres<sup>1</sup>, Pazit Polak<sup>1</sup>, Ida Lindeman<sup>2</sup>, Ivana Mikocziova<sup>2</sup>, Vikas Kumar Sarna<sup>2</sup>, Knut E. A. Lundin<sup>2</sup>, Christopher Clouser<sup>3</sup>, Francois Vigneault<sup>3</sup>, Andrew M. Collins<sup>4</sup>, Ludvig M. Sollid<sup>2</sup>, and Gur Yaari<sup>1</sup>

<sup>1</sup>Faculty of Engineering, Bar Ilan University, Ramat Gan 5290002, Israel

<sup>2</sup>KG Jebsen Centre for Coeliac Disease Research and Department of Immunology, University of Oslo and Oslo University Hospital, 0372 Oslo, Norway

<sup>3</sup>AbVitro, Inc., Boston, MA, USA

<sup>4</sup>School of Biotechnology and Biomolecular Sciences, University of NSW, Kensington, Sydney, NSW 2052 Australia

## **Supplementary material**

## Supplementary Figures

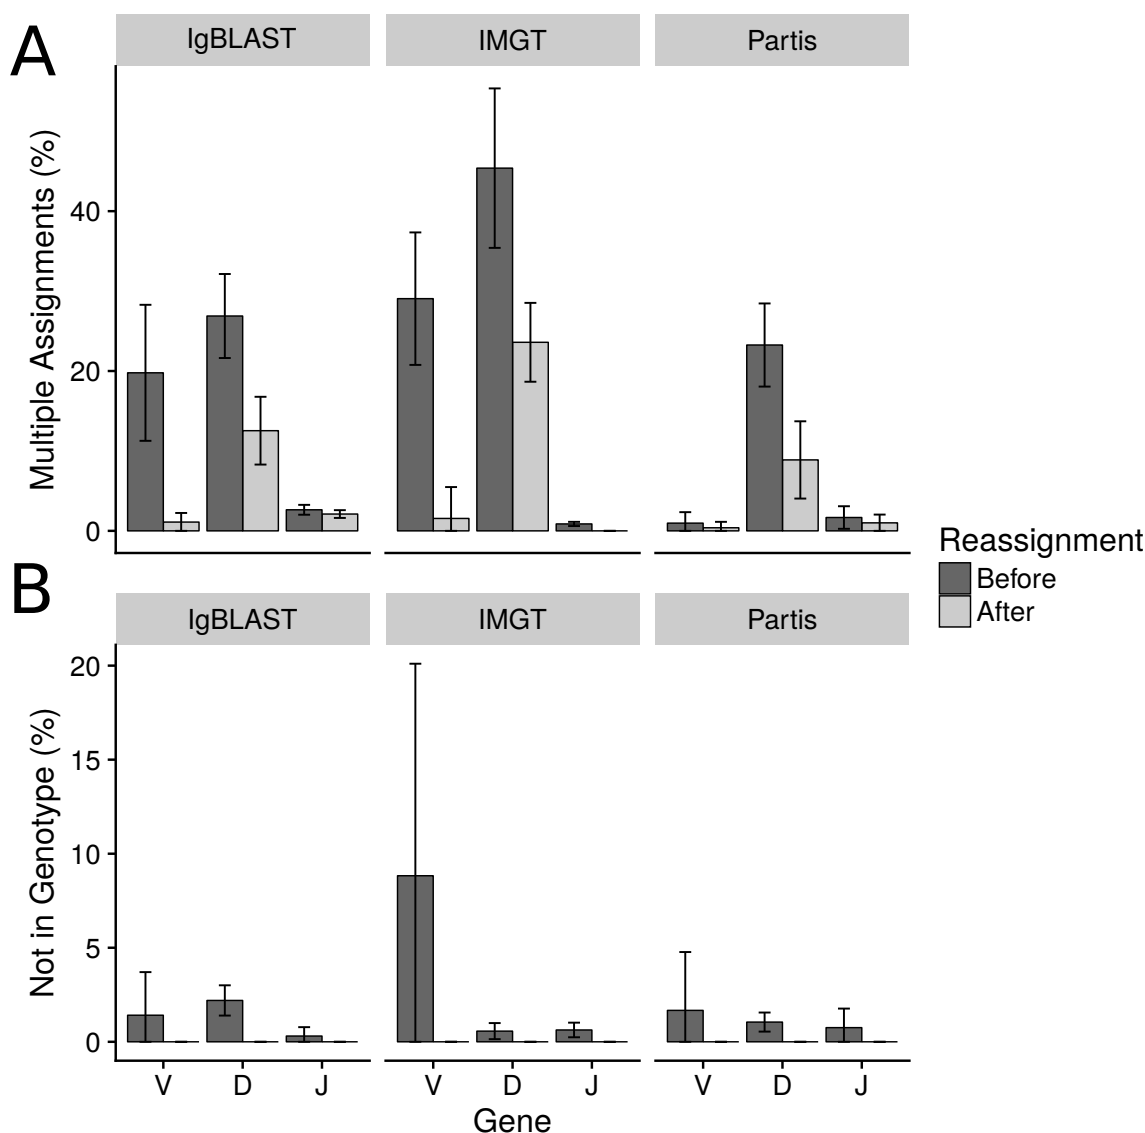

Supplementary Figure 1: **Genotyping reduces multiple allele assignments** The mean percent of multiple assignments and the percentage of genes not in genotype for all individuals across antibody heavy chain genes, before and after genotyping. Alignment was performed using IgBLAST, partis or IMGT. (A) Multiple assignment is reduced by approximately half. (B) After the second assignment, genes originally not assigned within the personal genotype were eliminated. Alignment with partis was applied using version 0.13.0<sup>1</sup>. In order to obtain the data for the pre-genotype process and the genotype annotation we provided the aligner with our own customized germlines. We used the following flags for partis: '- -skip-unproductive', '- -dont-find-new-alleles', and '- -initial-germline-dir'. We ran the received data through an in-house parser to get the needed layout for TIgGER use, there we defined a multiple assignment when the difference in score between the first assignment and the others was less than 0.2. Alignment with IMGT/HighV-QUEST<sup>2</sup> was applied using version 1.5.7.1 with a parameter modification to allow more assignment in *D* genes. Since IMGT does not accept customized germline, we had to rename the genes after the first alignment. To implement the second realignment step with the individual's own customized reference, we used the reassignAlleles function with Hamming distance from TIgGER for the *J* genes, and a weighted Levenshtein distance for *D* genes.

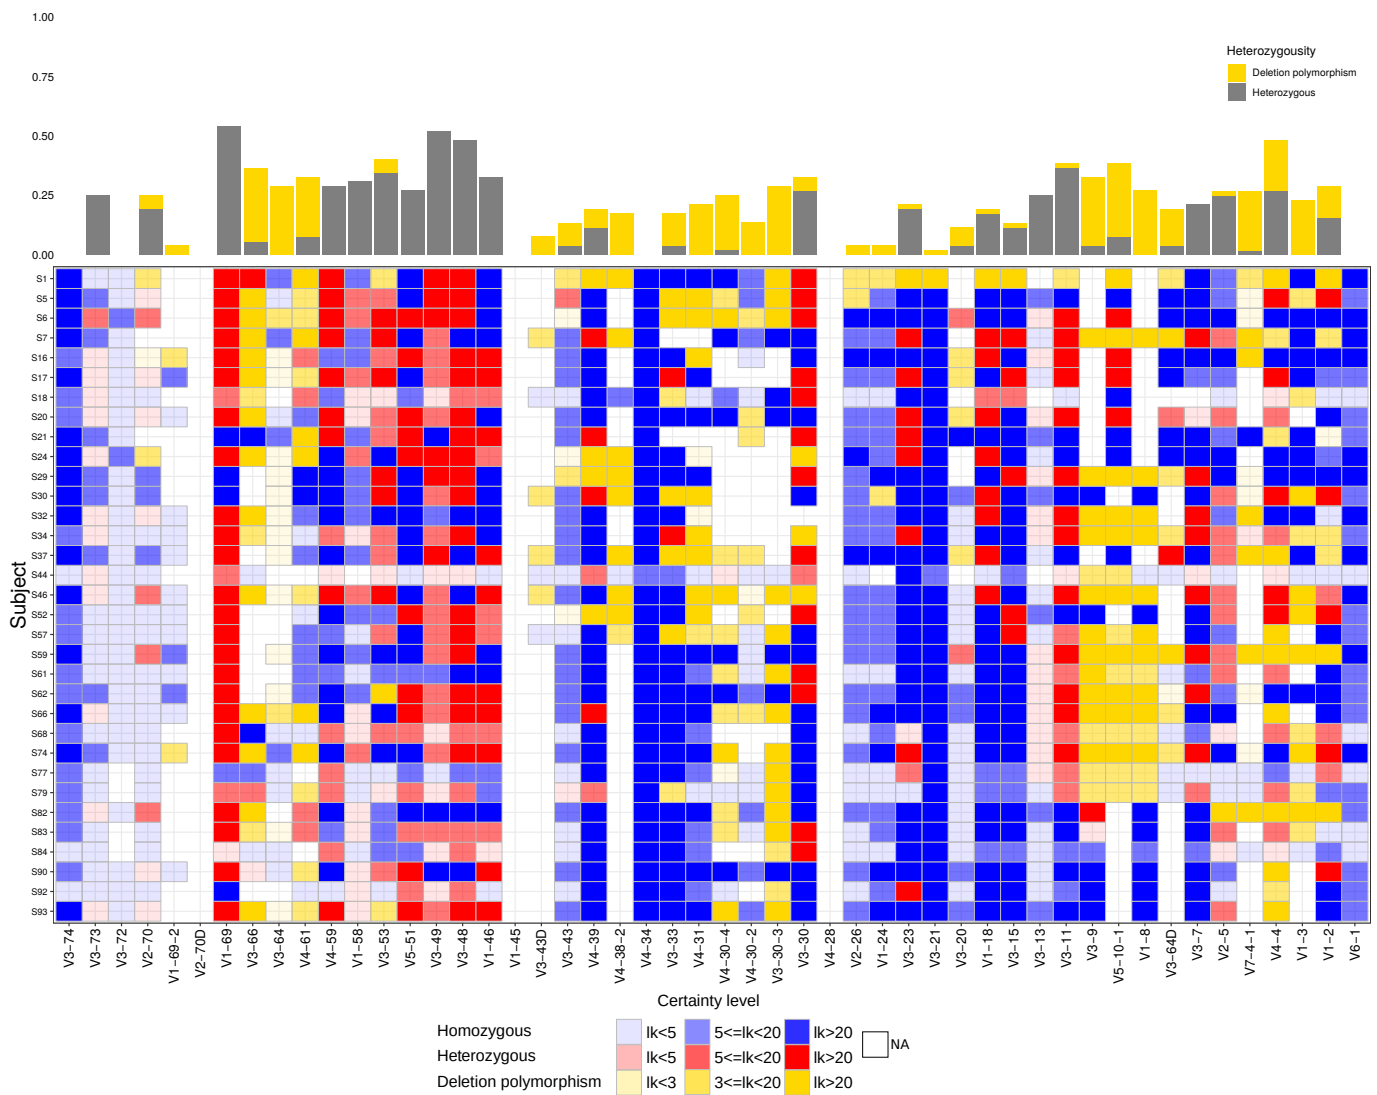

Supplementary Figure 2: **Heterozygosity of the IGH genes including deletion polymorphisms.** Each row represents a  $J\delta$  heterozygous individual, and each column represents a  $V$  gene. Red shades represent heterozygous genes, blue shades homozygous genes, and yellow shades genes with deletion polymorphisms. Transparency corresponds to the certainty level of genotype or haplotype inference. White represents a gene with too low usage (fewer than 10 sequences) to enable clear genotype inference. Bars on top represent the ratio between the number of individuals with heterozygous genes and all individuals with a defined genotype for this gene. Bar color correspond to the type of heterozygosity (deletion polymorphism, and heterozygosity due to two distinct alleles).

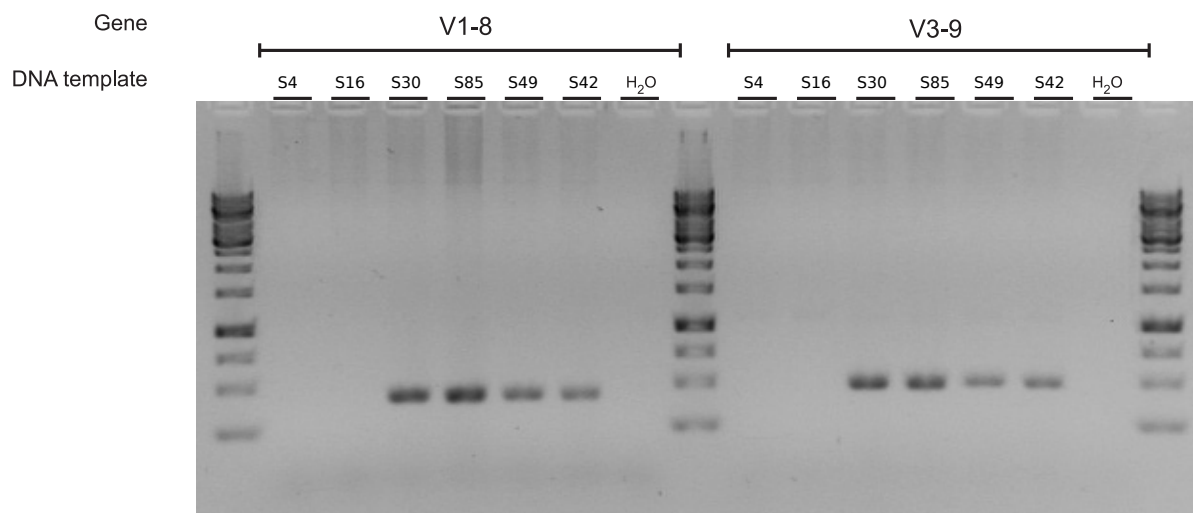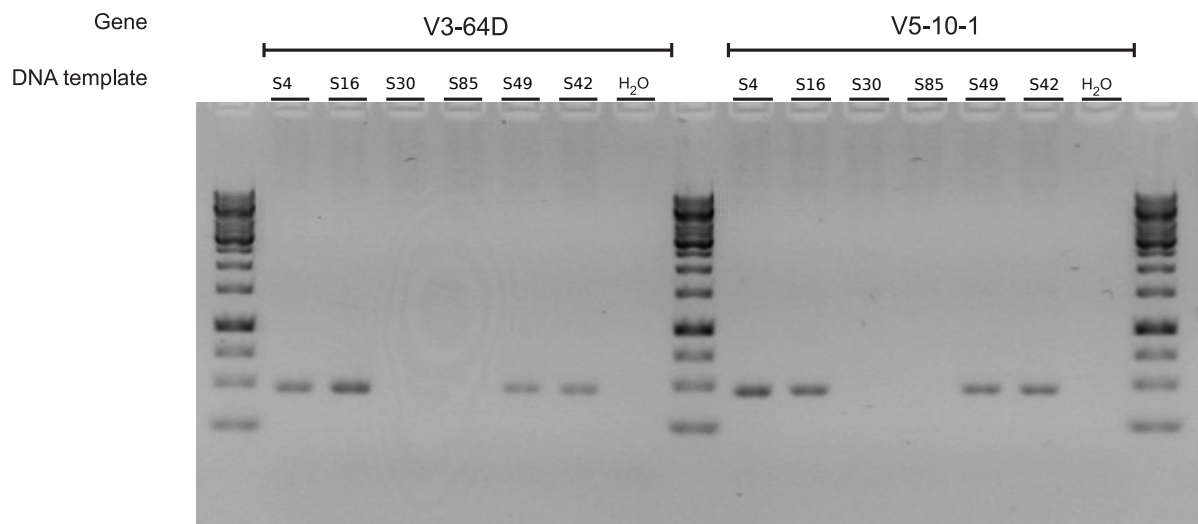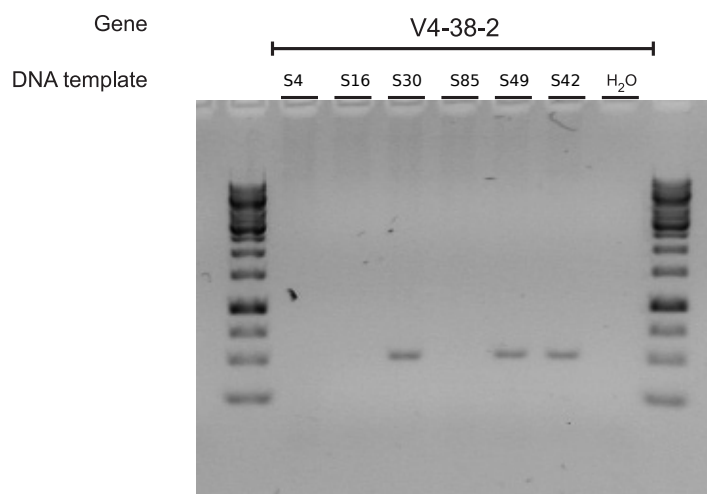

Supplementary Figure 3: **V-gene deletions on the genomic level.** Five genes were amplified by custom-designed gene-specific primers from gDNA and the products were analyzed by gel electrophoresis. GeneRuler 1kb (ThermoFisher) was used as a ladder. As a negative control, water was used instead of a gDNA template. Individuals S42 and S49, who were not predicted to have deletions of the tested genes, were used as positive controls.

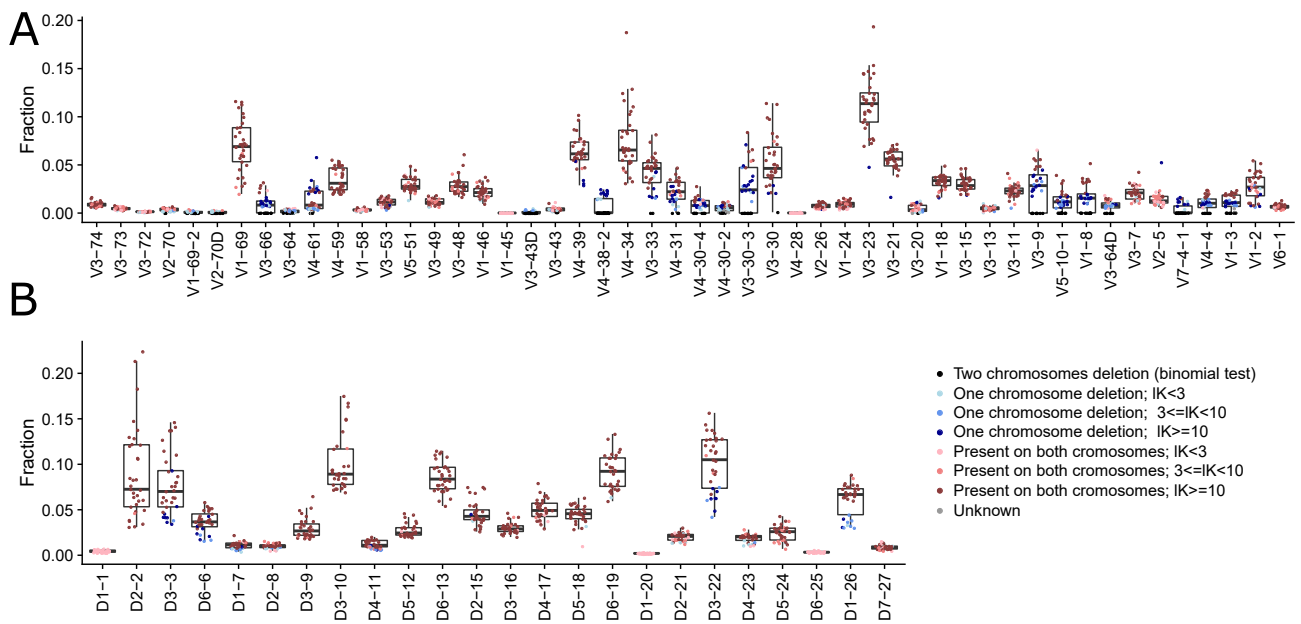

Supplementary Figure 4: **Relative gene usage of *J6* heterozygous individuals.** Relative usage of *V* (A) and *D* (B) genes from *J6* heterozygous individuals. Each dot represents an individual. Color corresponds to gene deletion from both chromosomes (black), single chromosome (blue), or no deletion (red). Shades correspond to the certainty level of deletion inference.

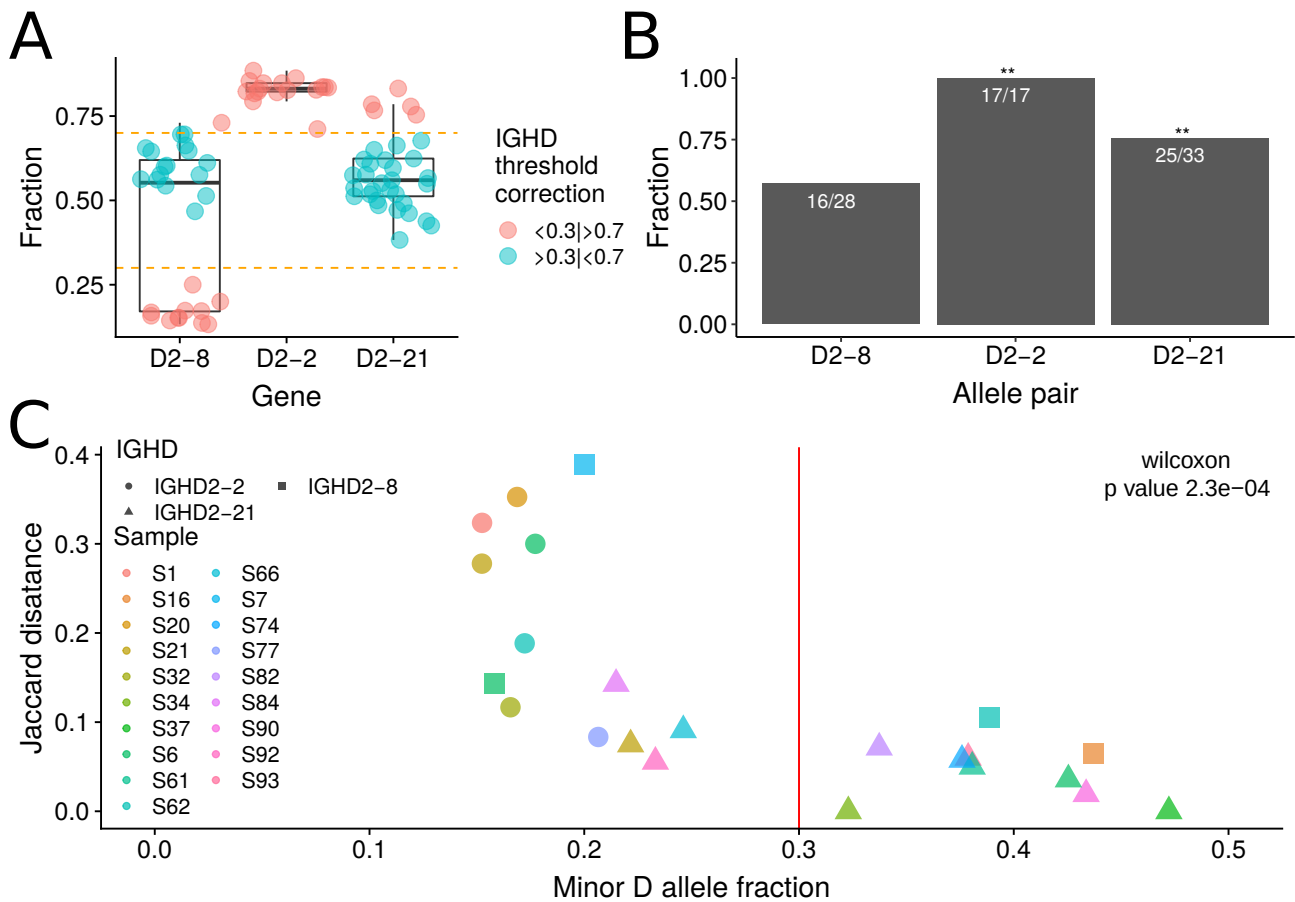

Supplementary Figure 5: **A *D* gene cutoff to be considered as heterozygous** Determining the heterozygosity cutoff for anchor *D* genes. (A) Box plot of anchor *D* gene allele pairs relative usage in heterozygous individuals. We considered allele pairs which were observed in more than 5 individuals, and each individual had a minimum of 5 *V-D-J* linkages for each of the alleles. Each point represents an individual. The allele fraction (Y axis) corresponds to the allele that is written first for each *D* gene, and is the dominant allele in most individuals. (B) The fraction of individuals with relative allele usage (of the first written allele, as in (A)) that is larger than 0.5. Asterisks indicate allele pairs with a statistically significant difference in the number of individuals with the same dominant allele. Statistical significance was determined with a binomial single sample sign test (see methods, \* indicates p value  $< 0.05$ , \*\* indicates p value  $< 0.01$ ). (C) To estimate the distance between two haplotypes inferred by different genes, a Jaccard distance was calculated (see methods). The maximum Jaccard distance between the two anchor *D* gene alleles was plotted against the minor allele fraction, where each point represents an individual that had a minimum of 5 genes tested in the Jaccard comparison and each of the genes had a minimum of five linkages with the question allele. This resulted in a reduction in *D* heterozygous samples to 31% for *D2-21* and 17% for *D2-8* (Supplementary Figure 6A). The three shapes of the dots: circle, triangle, and square correspond to the three anchor *D* genes *D2-2*, *D2-21*, and *D2-8*, respectively. Wilcoxon test was used to assert the cutoff that differentiates between the two groups' means. A cutoff of 0.3 was set with a p-value  $< 2e - 03$ .

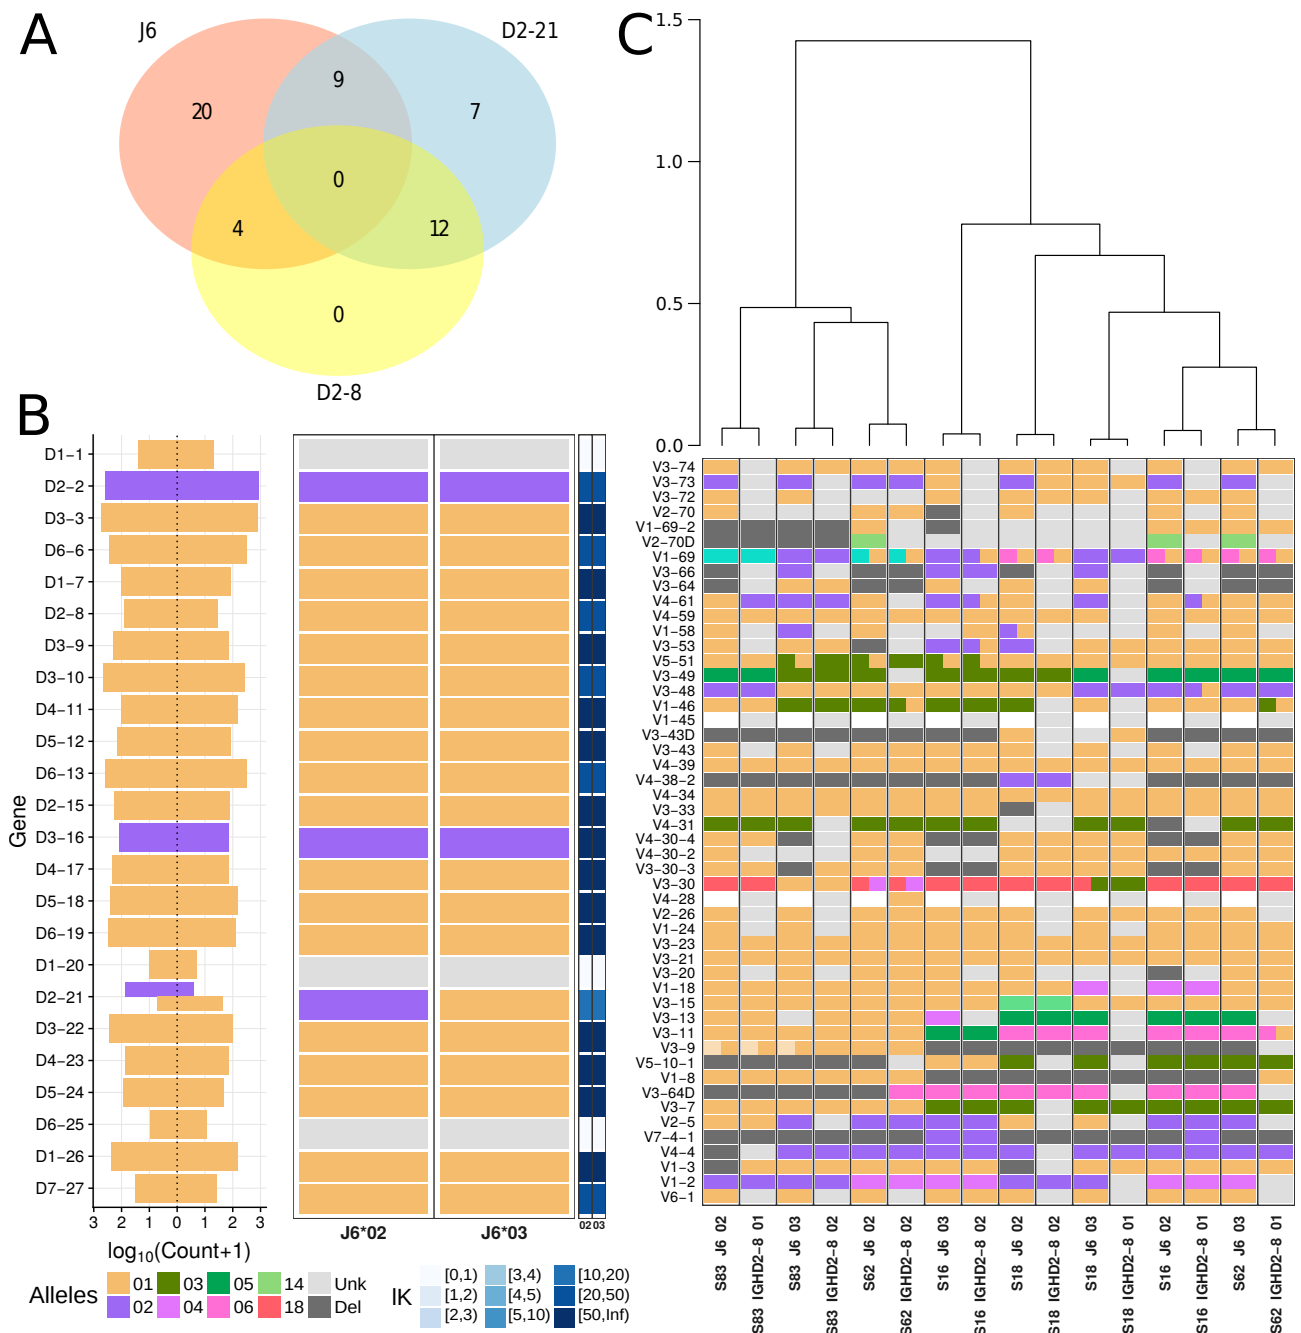

Supplementary Figure 6: **D-based haplotype inference.** (A) A Venn diagram of heterozygous individuals for *J6*, *D2-8* and *D2-21* genes. 54% of the individuals were identified as heterozygous in at least one of these anchor genes. (B) An example for *D* gene haplotype anchored by *J6* gene for a single individual. The left panel shows the count of each *D* gene (Y axis) that is associated with its paired anchor *J6* gene (X axis). The thickness of the count bar is inversely proportional to the number of alleles found on the chromosome. Colors correspond to the different alleles. The middle panel shows the called *D* haplotype, and the right panel shows the certainty level (*IK*) for each haplotype decision. (C) V haplotype map where each column corresponds to a *J6*- or *D2-8*-based haplotype of an individual that is heterozygous for both these genes. The order of columns was determined by a hierarchical dendrogram based on the distances between individual haplotypes.

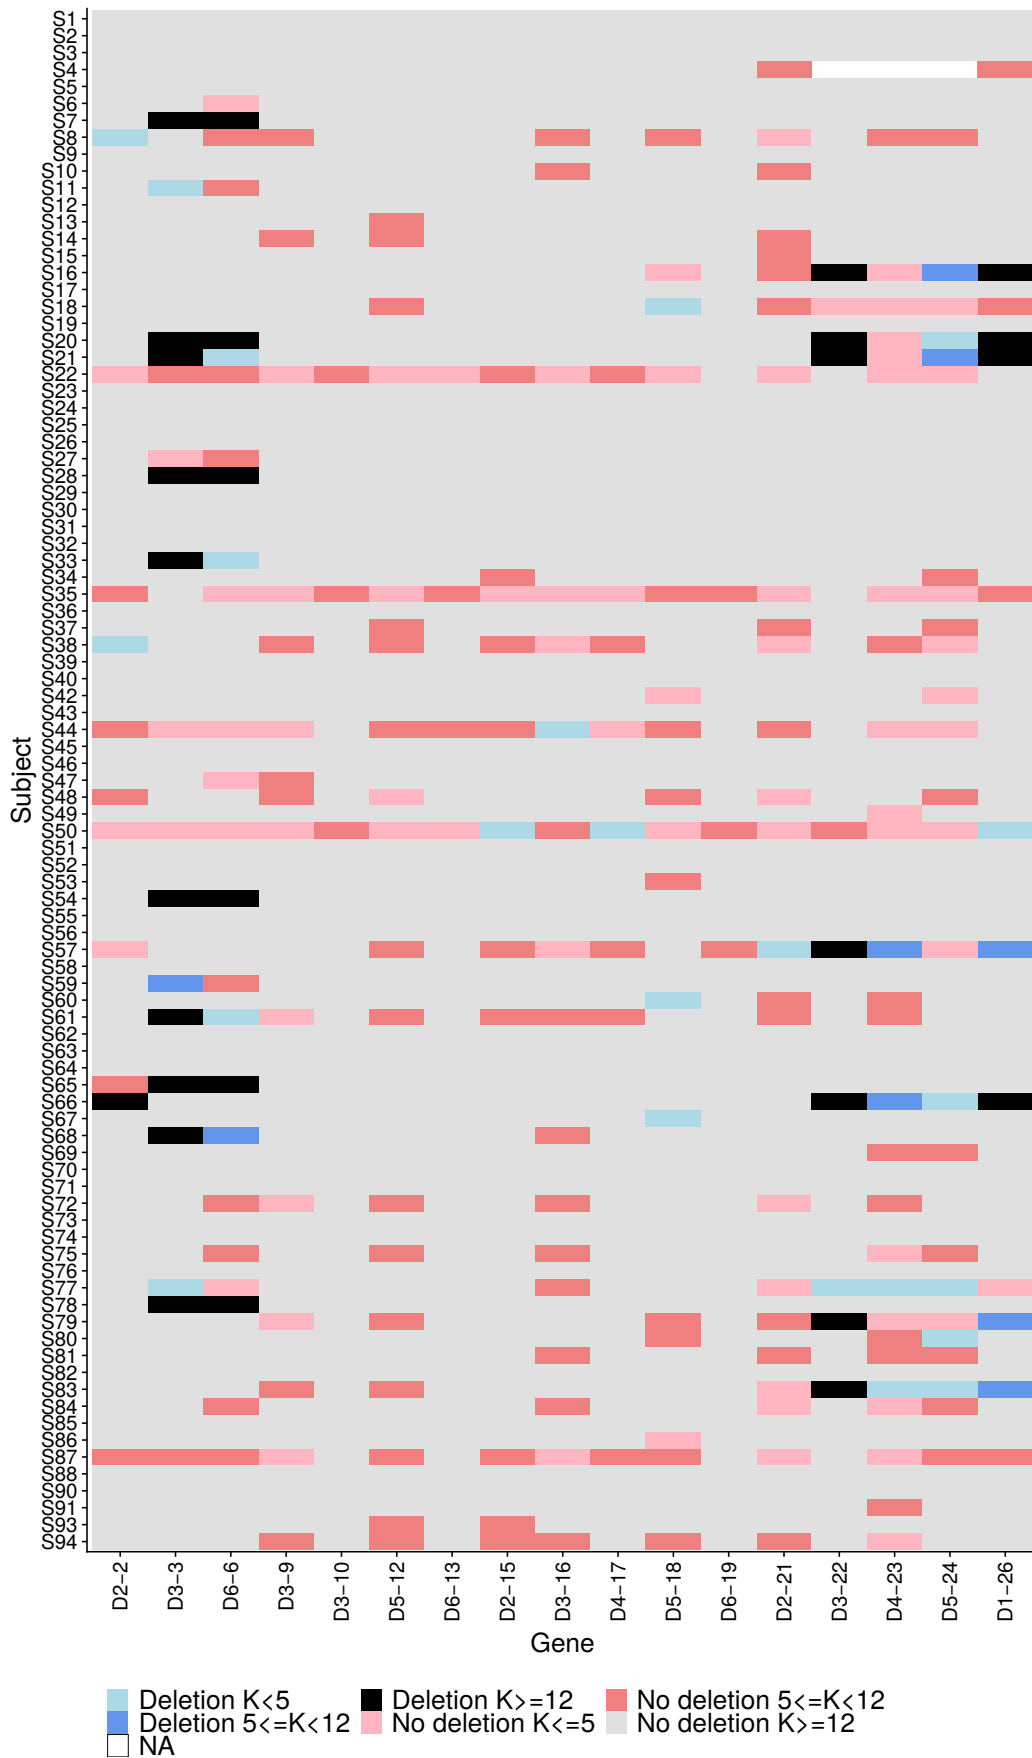

Supplementary Figure 7: **Chromosome deletion detection by pooled heterozygous V genes in the entire cohort.** For each individual (Y axis) and gene (X axis), each cell represents the deletion status of a gene (deletion/no deletion). The color indicates the certainty level of the decision. For the presented  $V_{pooled}$  approach only heterozygous V genes with minor allele fraction larger than 30% were included.



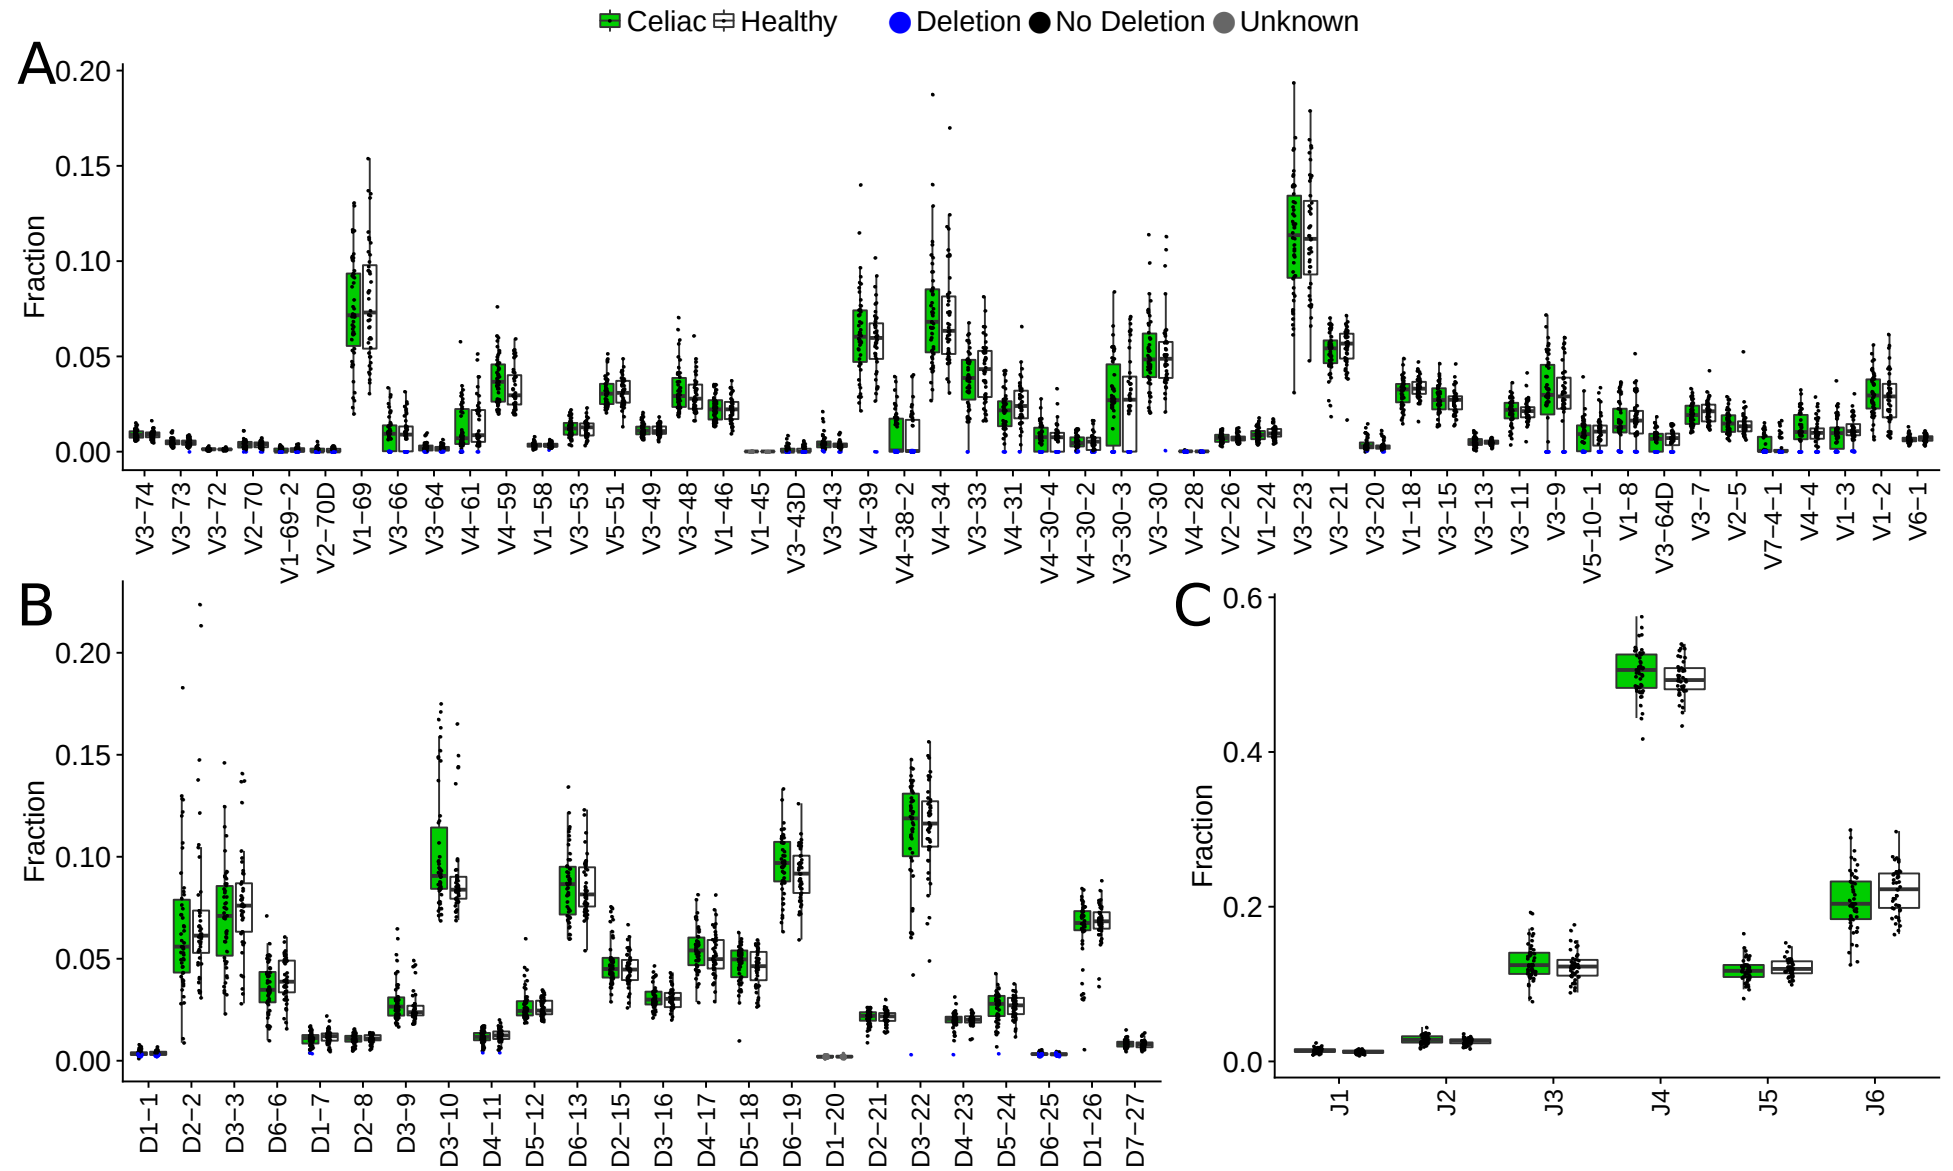

Supplementary Figure 8: **Gene deletion inference by relative gene usage with respect to clinical status.** Box plots of relative gene usage, where each dot represents a single individual, separated into celiac patients (green) and healthy individuals (white), for *V* (panel A), *D* (panel B), and *J* (panel C) genes. Blue represents deleted genes according to the binomial test (see methods).

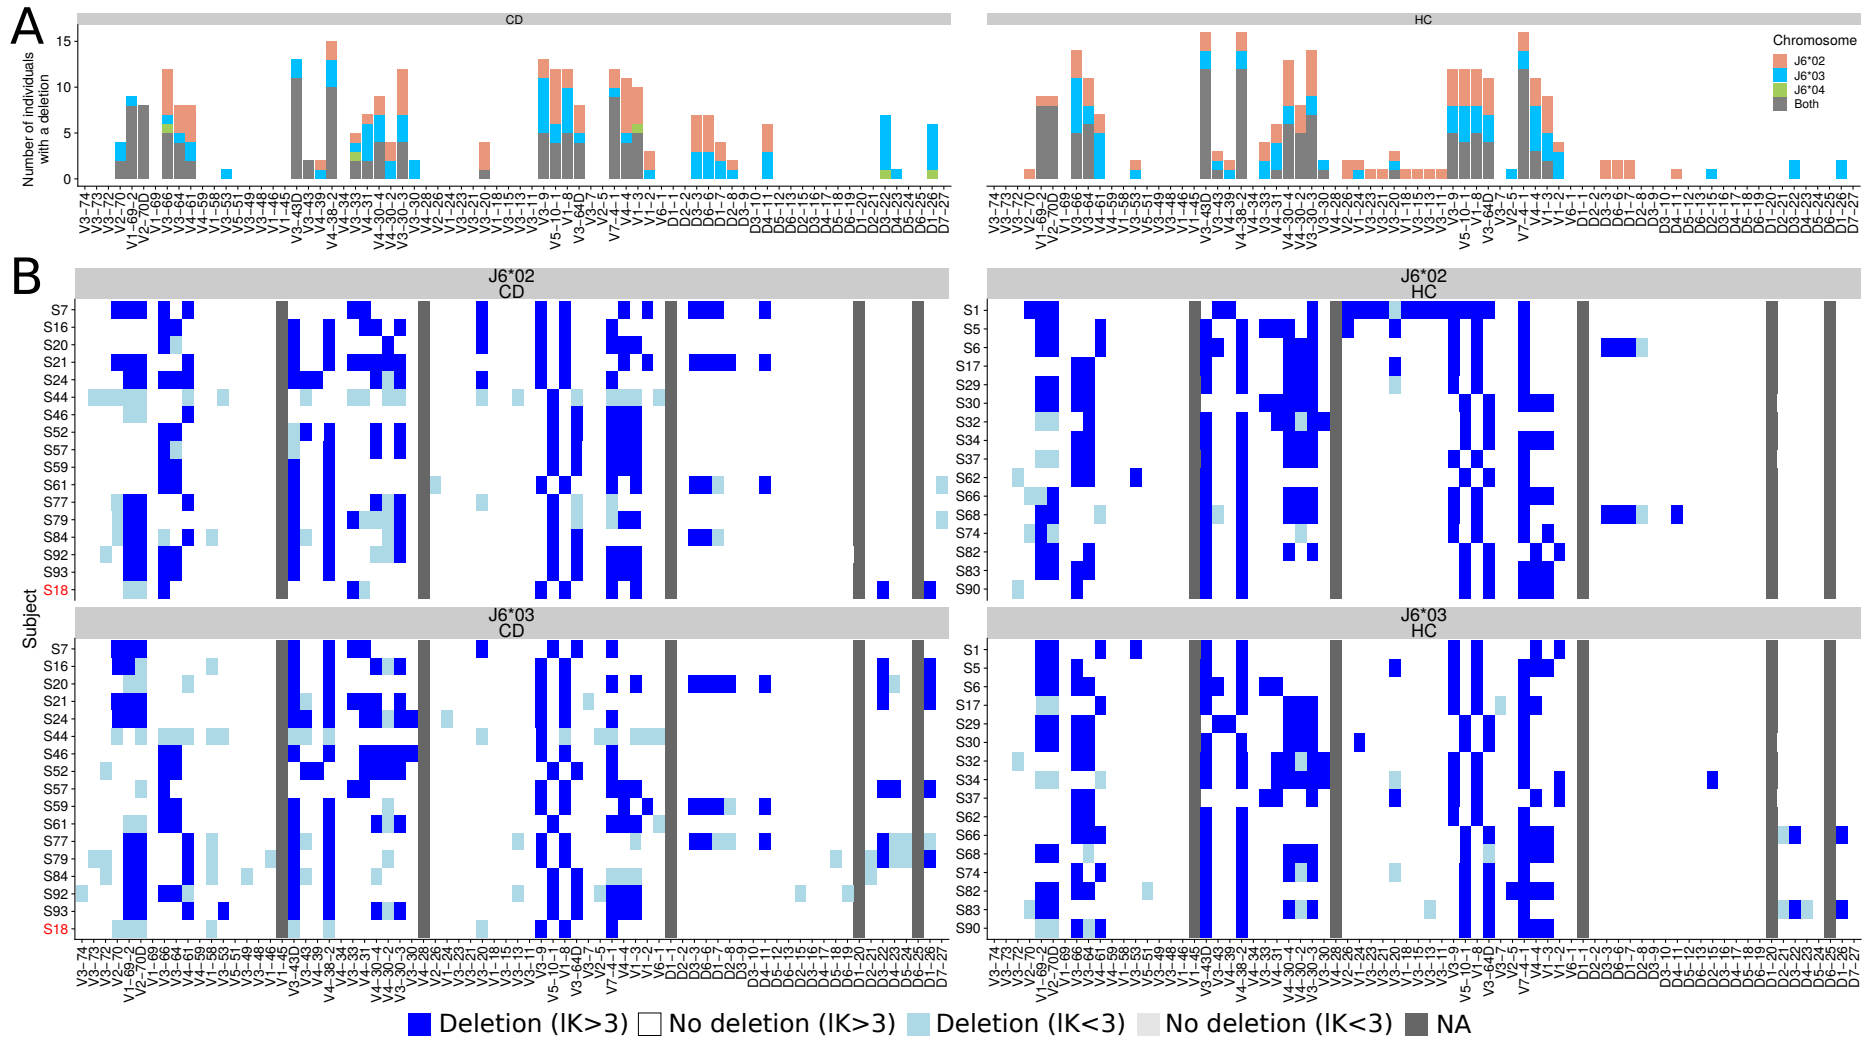

Supplementary Figure 9: **Gene deletion inference along each chromosome according to clinical status.** (A) The distribution of *V* and *D* gene deletions along each chromosome in 32 individuals that are heterozygous for *J6*, separated into celiac disease patients (left panel) and healthy individuals (right panel), as inferred by haplotype (light red, blue, and green) and by the binomial test (gray) (B) A heatmap of *V* and *D* gene deletions and suspected deletions for each of the 32 heterozygous individuals in *J6*, separated into celiac patients (left panel) and healthy individuals (right panel). Each row represents an individual, and each column represents *V* or *D* gene. Blue represents a deletion ( $IK > 3$ ), light blue represents a suspected deletion ( $IK < 3$ ), and light gray represents no deletion on both chromosomes with low certainty ( $IK < 3$ ). Dark gray represents a gene with an extremely low usage across all samples. The top panel represents the chromosome on which *J6\*02* is present, and the bottom panel represents the chromosome on which *J6\*03* is present. Sample S18, marked in red, is heterozygous for *J6\*03* and *J6\*04*. For this individual, *J6\*04* was added to the *J6\*02* panel.

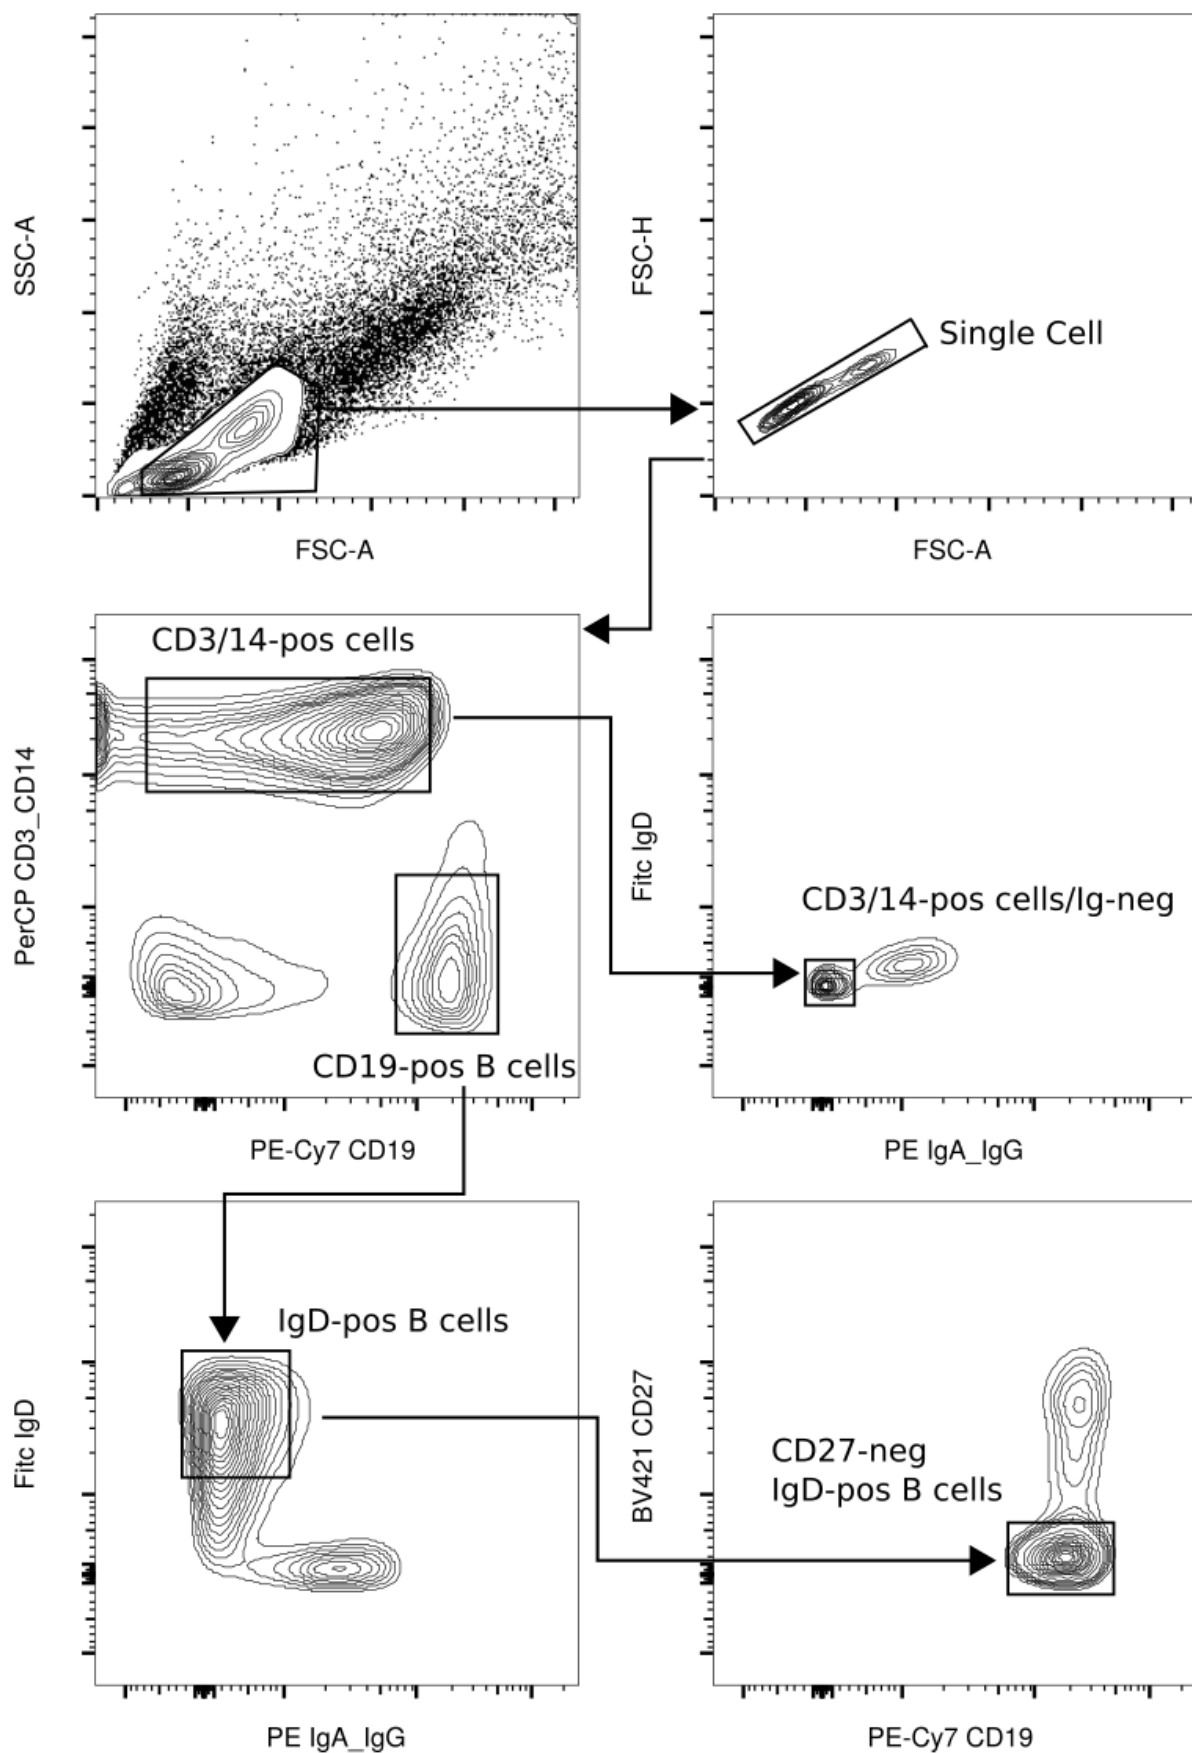

Supplementary Figure 10: **Gating strategy for cell sorting of non B cells and naïve IgD+ B cells.** Gating strategy for sorting non-B cells (for gDNA extraction) and naïve IgD-expressing B cells (for RNA extraction). Non-B cells were sorted for being CD19-negative, CD3/CD14-positive and negative for any true/false signal from anti-IgD/IgA/IgG antibodies (mid right panel). Naïve B cells were defined as CD19-positive cells that were negative for CD3 and CD14, IgD-positive and IgA/IgG-negative that were also negative for the memory B marker CD27 (lower right panel). Arrows indicate sequential gating.

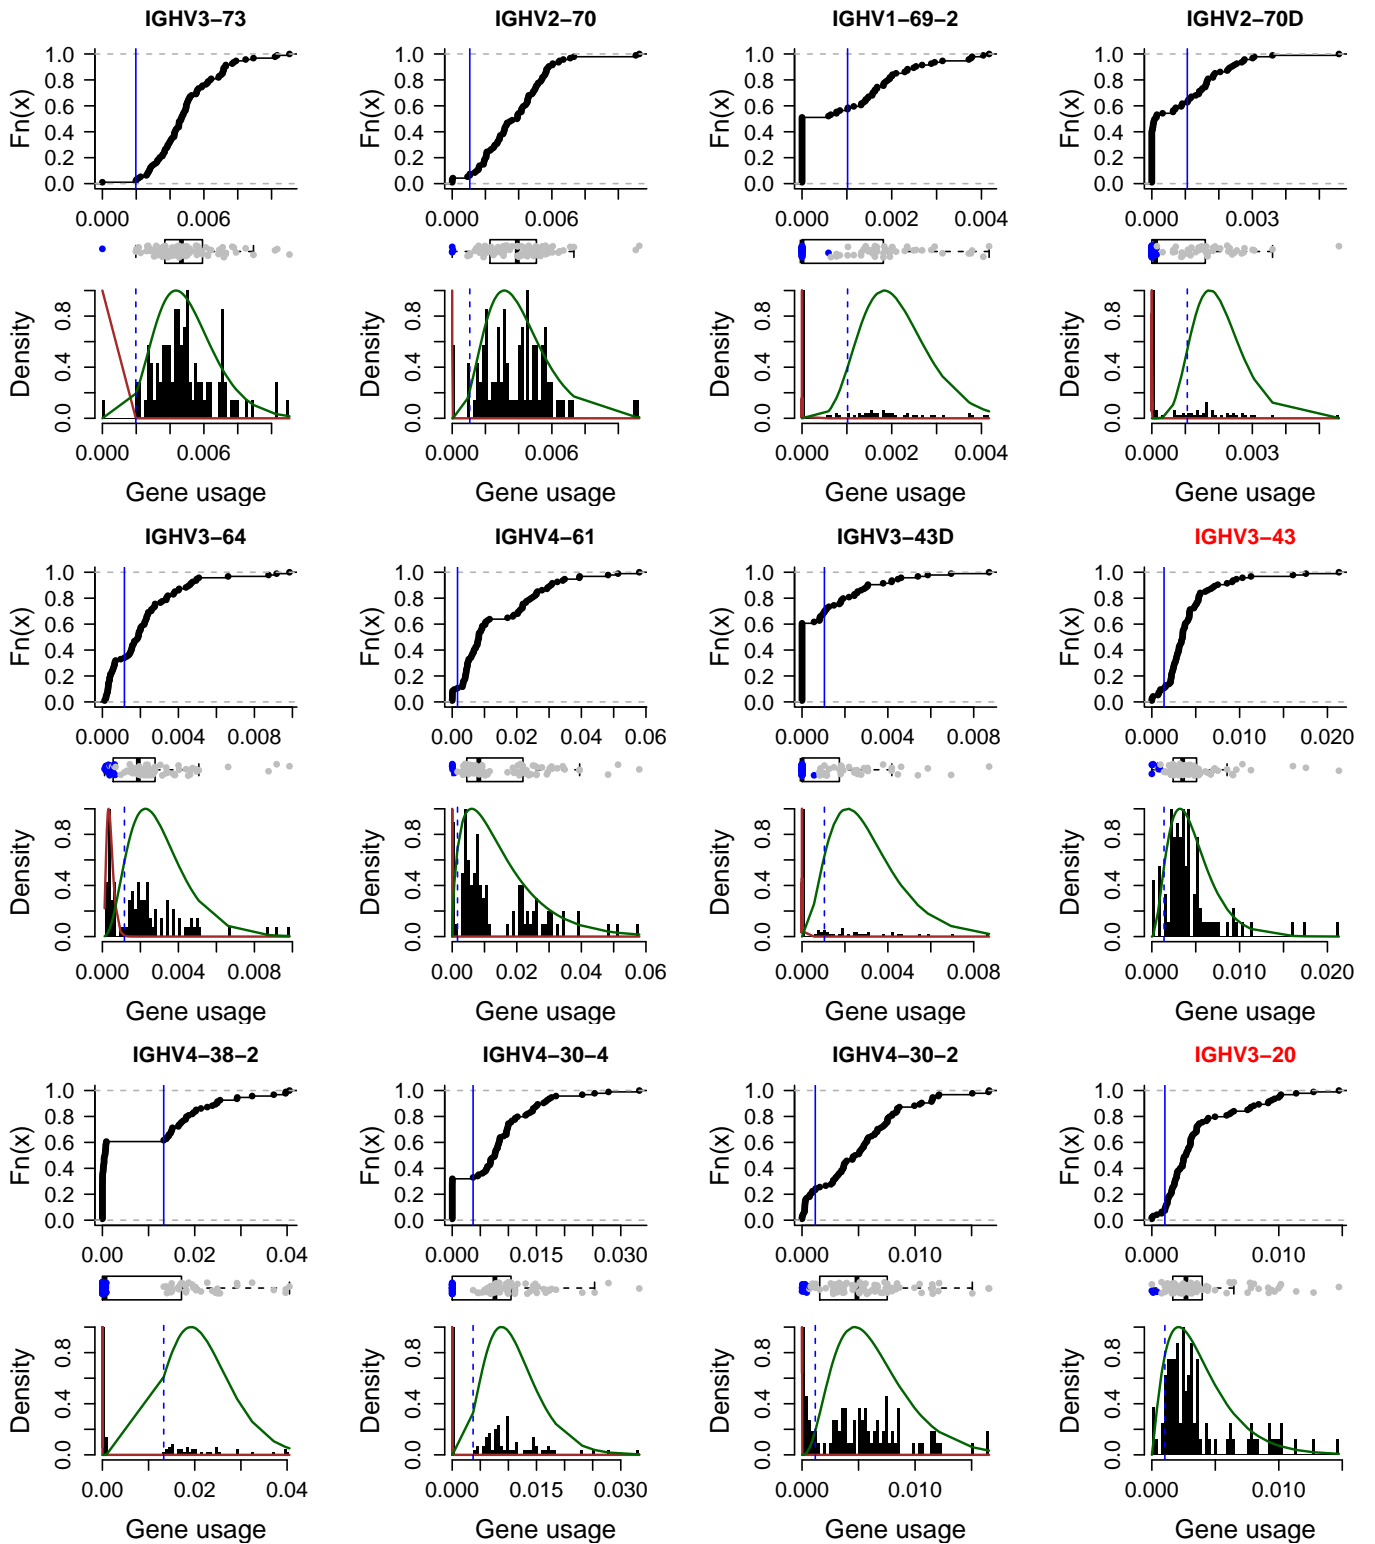

Supplementary Figure 11: **Bimodal distribution of low expressed genes.** For each gene with low usage, an empirical cumulative distribution function curve of the gene usage (upper panel for each gene), boxplot of the gene usage where the deletions are marked in blue (middle panel for each gene), and a histogram of the gene usage with the estimated gamma distributions(lower panel for each gene) are shown. Genes with labels marked in red do not follow a bimodal behavior, therefore deletion detection is considered less reliable for them.

## Supplementary Tables

| Sample | Number of naive B cells | RIN | Paired sequences | Unique sequences | Single assignment VDJ |
|--------|-------------------------|-----|------------------|------------------|-----------------------|
| S1     | 3.5e5                   | 10  | 936044           | 34756            | 28977                 |
| S2     | 4.5e5                   | 9.8 | 896721           | 31108            | 26849                 |
| S3     | 4.2e5                   | 9.4 | 736291           | 38716            | 32937                 |
| S4     | 3.5e5                   | 8.8 | 872281           | 26747            | 21282                 |
| S5     | 3.5e5                   | 8.5 | 662652           | 37984            | 32223                 |
| S6     | 4e5                     | 9.5 | 1016502          | 53829            | 43847                 |
| S7     | 3e5                     | 9.4 | 717247           | 42842            | 36776                 |
| S8     | 3.5e5                   | 9.3 | 821769           | 5469             | 4464                  |
| S9     | 7e5                     | 8.5 | 747468           | 34650            | 29217                 |
| S10    | 2.5e5                   | 7.6 | 953488           | 6656             | 5595                  |
| S11    | 3.5e5                   | 9.1 | 847040           | 26612            | 22682                 |
| S12    | 3.5e5                   | 9.9 | 788419           | 30277            | 25721                 |
| S13    | 3e5                     | 9.3 | 917742           | 54470            | 45287                 |
| S14    | 3.5e5                   | 10  | 625901           | 19042            | 16499                 |
| S15    | 2.4e5                   | 8.5 | 1006142          | 54030            | 45021                 |
| S16    | 2.5e5                   | 9.2 | 876395           | 39773            | 33357                 |
| S17    | 3e5                     | 7   | 1192473          | 26036            | 21957                 |
| S18    | 8.5e5                   | 8   | 1206532          | 7798             | 6218                  |
| S19    | 4e5                     | 9.1 | 781842           | 46688            | 39487                 |
| S20    | 5e5                     | 8.7 | 537152           | 27361            | 22607                 |
| S21    | 3.5e5                   | 9.7 | 1133385          | 27712            | 22205                 |
| S22    | 3.5e5                   | 8.5 | 815183           | 11902            | 10170                 |
| S23    | 2.8e5                   | 9.3 | 967969           | 48795            | 42069                 |
| S24    | 4e5                     | 8.9 | 700587           | 35643            | 29149                 |
| S25    | 4.5e5                   | 8.8 | 749075           | 34025            | 28290                 |
| S26    | 2.5e5                   | 9.5 | 1115341          | 55694            | 46951                 |
| S27    | 2.3e5                   | 9.6 | 716100           | 33553            | 28048                 |
| S28    | 1e5                     | 9.2 | 775067           | 28194            | 23614                 |
| S29    | 3.5e5                   | 8.6 | 841336           | 37040            | 31401                 |
| S30    | 3.5e5                   | 9.6 | 1044881          | 37573            | 32322                 |
| S31    | 6e5                     | 8.8 | 786272           | 36442            | 30946                 |
| S32    | 2.5e5                   | 9.7 | 653913           | 22147            | 18532                 |

Supplementary Table 1: **Sequencing data summary.** The first column represents the sample name. The second column shows the number of sorted naïve B cells. The third column shows the sample RIN scores. The fourth column shows the number of assembled paired sequences for each sample. The fifth column shows the number of sequences after the initial *VDJ* alignment using IgBLAST, which were functional, had a read count above 2, a *V* gene mutation count below 3, and no mutations in the *D* gene. The sixth and last column shows the number of sequences with a single assignment for each of the *VDJ* genes for each sample.

| Sample | Number of naive B cells | RIN | Paired sequences | Unique sequences | Single assignment VDJ |
|--------|-------------------------|-----|------------------|------------------|-----------------------|
| S33    | 3.5e5                   | 8.6 | 820166           | 27688            | 23960                 |
| S34    | 2.5e5                   | 8.1 | 699674           | 18231            | 15428                 |
| S35    | 2.5e5                   | 7.8 | 886829           | 6270             | 5439                  |
| S36    | 3.5e5                   | 9.2 | 777346           | 36919            | 31690                 |
| S37    | 4e5                     | 9   | 796176           | 39383            | 33301                 |
| S38    | 2.5e5                   | 7.2 | 646166           | 4074             | 3471                  |
| S39    | 5e5                     | 9.8 | 678202           | 19349            | 15486                 |
| S40    | 2.5e5                   | 7.8 | 948734           | 12746            | 10942                 |
| S41    | 1.5e5                   | 7.2 | 780665           | 2548             | 2109                  |
| S42    | 3.5e5                   | 9.1 | 717585           | 30336            | 25666                 |
| S43    | 5e5                     | 8.5 | 582384           | 36305            | 30872                 |
| S44    | 3e5                     | 7.5 | 730609           | 3117             | 2708                  |
| S45    | 1.1e5                   | 9.3 | 814191           | 17652            | 15363                 |
| S46    | 3.5e5                   | 9.9 | 933332           | 39848            | 33827                 |
| S47    | 2.5e5                   | 10  | 1014845          | 32405            | 27696                 |
| S48    | 3e5                     | 6.4 | 1021241          | 5756             | 4870                  |
| S49    | 3.8e5                   | 9.3 | 634033           | 14603            | 12470                 |
| S50    | 3e5                     | 8.5 | 777167           | 15824            | 13442                 |
| S51    | 3e5                     | 8.9 | 789479           | 27543            | 23722                 |
| S52    | 5e5                     | 8.7 | 880247           | 31001            | 26093                 |
| S53    | 1.2e5                   | 9.1 | 974061           | 22964            | 19558                 |
| S54    | 4e5                     | 9   | 989353           | 50241            | 44485                 |
| S55    | 2.5e5                   | 9.1 | 946647           | 39230            | 33253                 |
| S56    | 4.5e5                   | 8.7 | 903587           | 41298            | 35776                 |
| S57    | 3.5e5                   | 8.4 | 756901           | 13783            | 12083                 |
| S58    | 9e5                     | 6.8 | 618095           | 35802            | 30762                 |
| S59    | 2.5e5                   | 9.3 | 906100           | 36518            | 32093                 |
| S60    | 2.8e5                   | 8.8 | 974636           | 45215            | 38689                 |
| S61    | 2.6e5                   | 8.8 | 473494           | 10419            | 9098                  |
| S62    | 1.8e5                   | 9   | 804185           | 35565            | 29070                 |

Supplementary Table 1: Sequencing data summary (Cont.)

| Sample | Number of naive B cells | RIN | Paired sequences | Unique sequences | Single assignment VDJ |
|--------|-------------------------|-----|------------------|------------------|-----------------------|
| S63    | 2.5e5                   | 9.4 | 892123           | 28823            | 23674                 |
| S64    | 3.5e5                   | 8.8 | 1247072          | 50146            | 43362                 |
| S65    | 2.5e5                   | 9.4 | 757705           | 37277            | 31002                 |
| S66    | 4e5                     | 9.3 | 1089824          | 46583            | 40108                 |
| S67    | 2.8e5                   | 9.7 | 816466           | 32359            | 27960                 |
| S68    | 3e5                     | 9.1 | 841563           | 9949             | 8559                  |
| S69    | 4e5                     | 9.1 | 952996           | 51314            | 44066                 |
| S70    | 4e5                     | 7.9 | 711166           | 23258            | 20097                 |
| S71    | 4e5                     | 8.6 | 979793           | 28455            | 24291                 |
| S72    | 3.1e5                   | 8.4 | 741015           | 6594             | 5732                  |
| S73    | 4e5                     | 8.2 | 679834           | 35316            | 30945                 |
| S74    | 4e5                     | 9   | 737264           | 38276            | 32565                 |
| S75    | 2.8e5                   | 9.3 | 977269           | 13592            | 11917                 |
| S76    | 3e5                     | 8.9 | 829329           | 46567            | 39337                 |
| S77    | 3.5e5                   | 9.8 | 1150471          | 6281             | 5117                  |
| S78    | 3e5                     | 7.3 | 1002758          | 13714            | 12056                 |
| S79    | 3.5e5                   | 9   | 917183           | 7880             | 6642                  |
| S80    | 1.1e5                   | 9.8 | 576024           | 15714            | 13135                 |
| S81    | 1.2e5                   | 9.4 | 795323           | 27966            | 23910                 |
| S82    | 4e5                     | 9.2 | 677994           | 32794            | 28225                 |
| S83    | 3e5                     | 9   | 927048           | 11647            | 8634                  |
| S84    | 3e5                     | 9.2 | 569276           | 8066             | 6678                  |
| S85    | 3e5                     | 8.8 | 900189           | 11158            | 9440                  |
| S86    | 2.5e5                   | 8.4 | 745469           | 21820            | 18232                 |
| S87    | 3.5e5                   | 9.6 | 1456927          | 7558             | 6530                  |
| S88    | 1.5e5                   | 9.2 | 902418           | 36937            | 31043                 |
| S89    | 4e5                     | 8.9 | 666271           | 34469            | 29569                 |
| S90    | 3.5e5                   | 9.3 | 915147           | 28631            | 24805                 |
| S91    | 2.3e5                   | 9.4 | 823833           | 26501            | 22922                 |
| S92    | 2.5e5                   | 8.8 | 1386237          | 8624             | 7278                  |
| S93    | 2.5e5                   | 7.7 | 730300           | 29955            | 25341                 |
| S94    | 4e5                     | 8.7 | 493745           | 21285            | 18253                 |

Supplementary Table 1: Sequencing data summary (Cont.)

**A**

|     | 10 <sup>6</sup> Cells | ng/μl |
|-----|-----------------------|-------|
| S4  | 3.5                   | 46.4  |
| S16 | 3.0                   | 38.7  |
| S30 | 4.3                   | 57.1  |
| S85 | 3.5                   | 57.5  |
| S49 | 3.5                   | 46.8  |
| S42 | 3.0                   | 50.9  |

**B**

|                | Sequence (5'-3')          |
|----------------|---------------------------|
| IGHV1-8_fwd    | GTAAGGGGCTTCCTAGTCTCAAAG  |
| IGHV1-8_rev    | TCTGACTCTCTGAGGATGTGGTTT  |
| IGHV3-9_fwd    | AGGACTCACCATGGAGTTGG      |
| IGHV3-9_rev    | TTTTTGTCTGGGCTCTCGCT      |
| IGHV3-64D_fwd  | TTCATGGAGAACTAGAGATAGTGTG |
| IGHV3-64D_rev  | GCTGTTTTTCTCCAGCGTTCC     |
| IGHV4-38-2_fwd | AGGGATCCAGACGTGAAGATA     |
| IGHV4-38-2_rev | GGCCTTGTATTCCGTGAGC       |
| IGHV5-10-1_fwd | CATCCTTGGCCTCCTCCTG       |
| IGHV5-10-1_rev | GGGTTTTAGACGGGCTCAGT      |

Supplementary Table 2: **Amplification of selected immunoglobulin variable heavy chain genes from gDNA.** (A) Cell number and gDNA concentration from T cells and monocytes together (non-B cells). (B) Custom-designed primers for amplification of selected immunoglobulin variable heavy chain genes from gDNA .



| SUBJECT-gene-primer       | IMGT annotation        | Identity             | Mutation     |
|---------------------------|------------------------|----------------------|--------------|
| S42-HV1-8-HV1-8_fwd       | Homsap IGHV1-8*01 F    | 100.00%.(288/288 nt) | -            |
| S42-HV3-9-HV3-9_fwd       | Homsap IGHV3-9*01 F    | 100.00%.(288/288 nt) | -            |
| S42-HV3-64D-HV3-64D_fwd   | Homsap IGHV3-64D*06 F  | 99.65%.(287/288 nt)  | g258>t (T86) |
| S42-HV4-38-2-HV4-38-2_fwd | Homsap IGHV4-38-2*01 F | 100.00%.(288/288 nt) | -            |
| S42-HV5-10-1-HV5-10-1_fwd | Homsap IGHV5-10-1*03 F | 100.00%.(288/288 nt) | -            |
|                           |                        |                      |              |
| S49-HV1-8-HV1-8_fwd       | Homsap IGHV1-8*01 F    | 100.00%.(288/288 nt) | -            |
| S49-HV3-9-HV3-9_fwd       | Homsap IGHV3-9*01 F    | 100.00%.(288/288 nt) | -            |
| S49-HV3-64D-HV3-64D_fwd   | Homsap IGHV3-64D*06 F  | 99.65%.(287/288 nt)  | g258>t (T86) |
| S49-HV4-38-2-HV4-38-2_fwd | Homsap IGHV4-38-2*01 F | 100.00%.(288/288 nt) | -            |
| S49-HV5-10-1-HV5-10-1_fwd | Homsap IGHV5-10-1*03 F | 100.00%.(288/288 nt) | -            |
|                           |                        |                      |              |
| S85-HV1-8-HV1-8_fwd       | Homsap IGHV1-8*01 F    | 100.00%.(288/288 nt) | -            |
| S85-HV3-9-HV3-9_fwd       | Homsap IGHV3-9*01 F    | 100.00%.(288/288 nt) | -            |
|                           |                        |                      |              |
| S30-HV1-8-HV1-8_fwd       | Homsap IGHV1-8*01 F    | 100.00%.(288/288 nt) | -            |
| S30-HV3-9-HV3-9_fwd       | Homsap IGHV3-9*01 F    | 100.00%.(288/288 nt) | -            |
| S30-HV4-38-2-HV4-38-2_fwd | Homsap IGHV4-38-2*02 F | 100.00%.(288/288 nt) | -            |
|                           |                        |                      |              |
| S16-HV3-64D-HV3-64D_fwd   | Homsap IGHV3-64D*06 F  | 100.00%.(288/288 nt) | -            |
| S16-HV5-10-1-HV5-10-1_fwd | Homsap IGHV5-10-1*01 F | 100.00%.(288/288 nt) | -            |
|                           |                        |                      |              |
| S4-HV3-64D-HV3-64D_fwd    | Homsap IGHV3-64D*06 F  | 100.00%.(288/288 nt) | -            |
| S4-HV5-10-1-HV5-10-1_fwd  | Homsap IGHV5-10-1*03 F | 100.00%.(288/288 nt) | -            |

Supplementary Table 3: **Sanger sequencing of PCR products.** PCR products, obtained by amplification of genomic DNA of selected individuals using gene-specific primers, were sequenced to confirm the specificity of the primers and verify the identity of the targeted genes. Novel allele *IGHV3-64D\*06\_G258T* was also found by TIGGER as part of 25 novel alleles described in methods.

| Gene    | $\mu_1$ | $sd_1$ | $n_1$ | $\mu_2$ | $sd_2$ | $n_2$ | Sensitivity 0.01 | Threshold 0.01 | Sensitivity 0.05 | Threshold 0.05 |
|---------|---------|--------|-------|---------|--------|-------|------------------|----------------|------------------|----------------|
| V3-66   | 0.0109  | 0.0026 | 14    | 0.0270  | 0.0043 | 4     | 0.1007           | 0.0072         | 0.9786           | 0.0165         |
| V3-53   | 0.0071  | 0.0018 | 2     | 0.0123  | 0.0034 | 18    | 0.1469           | 0.0033         | 0.3633           | 0.0060         |
| V4-39   | 0.0369  | 0.0116 | 4     | 0.0683  | 0.0134 | 25    | 0.4355           | 0.0348         | 0.7393           | 0.0453         |
| V3-33   | 0.0271  | 0.0126 | 6     | 0.0492  | 0.0125 | 22    | 0.2443           | 0.0174         | 0.5175           | 0.0276         |
| V4-31   | 0.0196  | 0.0063 | 8     | 0.0326  | 0.0070 | 13    | 0.1921           | 0.0135         | 0.5264           | 0.0198         |
| V4-30-4 | 0.0093  | 0.0026 | 7     | 0.0171  | 0.0058 | 6     | 0.0062           | 0.0000         | 0.0989           | 0.0054         |
| V4-30-2 | 0.0075  | 0.0014 | 4     | 0.0089  | 0.0019 | 5     | 0.0127           | 0.0018         | 0.0761           | 0.0048         |
| V3-30-3 | 0.0339  | 0.0148 | 11    | 0.0633  | 0.0138 | 5     | 0.0824           | 0.0114         | 0.5009           | 0.0336         |
| V3-30   | 0.0235  | 0.0046 | 3     | 0.0574  | 0.0256 | 27    | 0.0184           | 0.0000         | 0.0852           | 0.0135         |
| V2-26   | 0.0055  | 0.0017 | 2     | 0.0087  | 0.0019 | 21    | 0.2511           | 0.0036         | 0.4709           | 0.0051         |
| V3-20   | 0.0103  | 0.0015 | 2     | 0.0082  | 0.0026 | 4     | 0.0469           | 0.0000         | 0.0586           | 0.0018         |
| V3-9    | 0.0305  | 0.0083 | 11    | 0.0482  | 0.0083 | 6     | 0.1253           | 0.0201         | 0.5486           | 0.0315         |
| V5-10-1 | 0.0120  | 0.0036 | 10    | 0.0238  | 0.0089 | 9     | 0.0042           | 0.0000         | 0.1088           | 0.0072         |
| V1-8    | 0.0156  | 0.0029 | 11    | 0.0344  | 0.0092 | 7     | 0.0035           | 0.0054         | 0.6331           | 0.0165         |
| V3-64D  | 0.0084  | 0.0016 | 3     | 0.0138  | 0.0023 | 4     | 0.0462           | 0.0033         | 0.5042           | 0.0084         |
| V4-4    | 0.0104  | 0.0013 | 10    | 0.0201  | 0.0030 | 7     | 0.6163           | 0.0105         | 0.9920           | 0.0141         |
| V1-3    | 0.0102  | 0.0017 | 8     | 0.0201  | 0.0019 | 11    | 0.9831           | 0.0147         | 0.9960           | 0.0165         |
| V1-2    | 0.0157  | 0.0079 | 5     | 0.0321  | 0.0144 | 20    | 0.0592           | 0.0000         | 0.1718           | 0.0072         |
| D3-3    | 0.0486  | 0.0189 | 8     | 0.0860  | 0.0299 | 23    | 0.0432           | 0.0108         | 0.2420           | 0.0345         |
| D6-6    | 0.0278  | 0.0092 | 6     | 0.0421  | 0.0083 | 23    | 0.2535           | 0.0210         | 0.4996           | 0.0276         |
| D4-11   | 0.0086  | 0.0034 | 2     | 0.0137  | 0.0031 | 21    | 0.2901           | 0.0057         | 0.4828           | 0.0081         |
| D3-22   | 0.0621  | 0.0088 | 5     | 0.1165  | 0.0219 | 22    | 0.4730           | 0.0613         | 0.9363           | 0.0787         |
| D1-26   | 0.0355  | 0.0065 | 2     | 0.0706  | 0.0067 | 23    | 0.8908           | 0.0538         | 0.9139           | 0.0589         |

Supplementary Table 4: **Threshold statistics for figure 6.** The annotation  $\mu_1, sd_1, n_1$  represent the single chromosome deletion group, and  $\mu_2, sd_2, n_2$  for no deletion.

## Supplementary References

- [1] Ralph, D. K. & Matsen IV, F. A. Consistency of VDJ rearrangement and substitution parameters enables accurate B cell receptor sequence annotation. *PLoS computational biology* **12**, e1004409 (2016).
- [2] Li, S. *et al.* IMGT/HighV QUEST paradigm for T cell receptor IMGT clonotype diversity and next generation repertoire immunoprofiling. *Nature communications* **4**, 2333 (2013).
